# Supplementary material for: Photoinduced Porcine Gelatin Cross-Linking by Homobi- and Homotrifunctional Tetrazoles
Source: MDPI journal article supplement (doi:10.3390/gels7030124), 2021-08-20

# **Supplementary Materials**

## **Photo-induced porcine gelatin cross-linking by homobi- and homotrifunctional tetrazoles**

Luca Vaghi<sup>1</sup>, Mauro Monti<sup>1</sup>, Marcello Marelli<sup>2</sup>, Elisa Motto<sup>3</sup>, Antonio Papagni<sup>1</sup> and  
Laura Cipolla<sup>3</sup>

<sup>1</sup> Dipartimento di Scienza dei Materiali, Università degli Studi di Milano-Bicocca, via R. Cozzi 55, 20125 Milano, Italy.

<sup>2</sup> Istituto di Scienze e Tecnologie Chimiche "Giulio Natta", CNR-SCITEC, Sede Fantoli, Via Fantoli 16/15, 20138 Milano, Italy.

<sup>3</sup> Dipartimento di Biotecnologie e Bioscienze, Università degli Studi di Milano-Bicocca, Piazza della Scienza 2, 20126 Milano, Italy.

### **Table of Contents**

**S2-S3. Procedures for the synthesis of 1-5.**

**S4-S11. <sup>1</sup>H NMR, <sup>13</sup>C NMR and ATR-FTIR spectra of synthesized compounds.**

**S12-S19. Video frames of thermal stability test at 37 °C.**

## Synthetic procedures

### General information

All reagents and solvents were purchased from commercial sources (Fluorochem Co.; Tokyo Chemical Industry Co. and Aldrich Chemical Co.) and used as received. Chromatographic purifications were performed using Merck 9385 silica gel, pore size 60 Å (230–400 mesh). Melting points were measured with a Stanford Research Systems Optimelt apparatus. IR spectra were recorded with a PerkinElmer Spectrum 100 FT-IR spectrometer equipped with universal ATR sampling accessory.  $^1\text{H}$  and  $^{13}\text{C}$  spectra were recorded with a Bruker AVANCE III HD 400 MHz spectrometer ( $^1\text{H}$ : 400 MHz,  $^{13}\text{C}$ : 101 MHz), chemical shifts ( $\delta$ ) are expressed in parts per million (ppm), and coupling constants are given in Hz. Splitting patterns are indicated as follows: s = singlet, d = doublet, t = triplet, q = quartet, m = multiplet, br = broad. Elemental analyses were obtained with an Elementar vario MICRO cube instrument. UV  $\lambda_{\text{max}}$  were determined with a PerkinElmer Lambda 900 spectrophotometer.

**1,4-bis(2-phenyl-2H-tetrazol-5-yl)benzene (1).** A mixture of terephthalaldehyde (1.00 g, 7.5 mmol) and *p*-Toluenesulfonyl hydrazide (2.92 g, 15 mmol) in EtOH (35 mL) was heated at reflux under stirring for 5 h. After cooling to r.t., the mixture was poured into cold water. The precipitate formed was recovered by filtration and dried at 80°C overnight. The precipitate was then dissolved in 30 mL of pyridine to give solution A. In parallel, a solution of  $\text{NaNO}_2$  (1.03 g, 15 mmol) in water (4 mL) was added dropwise to a cooled (0 °C) mixture of aniline (1.40 g, 15 mmol), concentrated HCl (37% in  $\text{H}_2\text{O}$ , 3.75 mL, 45 mmol),  $\text{H}_2\text{O}$  (5 mL) and EtOH (5 mL) to give solution B. Solution A was cooled with an ice bath and solution B was then slowly added. The mixture was stirred overnight at r.t.. The mixture was then poured into an aqueous HCl solution (200 mL, 3 M) and the precipitate was recovered by filtration. Crystallization (EtOAc) afforded **1** in a pure form (1.51 g, 55%). Pink solid; m.p.: 184–185 °C dec;  $^1\text{H}$  NMR (400 MHz,  $\text{CDCl}_3$ )  $\delta$  8.44 (s, 4H), 8.26 – 8.22 (m, 4H), 7.64 – 7.58 (m, 4H), 7.57 – 7.50 (m, 2H).  $^{13}\text{C}$  NMR (101 MHz,  $\text{CDCl}_3$ )  $\delta$  164.6, 149.7, 136.8, 136.1, 129.8, 129.7, 127.6, 123.8, 119.9. IR (ATR): 3191, 1596, 1560, 1492, 1471, 1450, 1425, 1361, 1322, 1300, 1277, 1213, 1187, 1165, 1093, 1053, 1011, 994, 954, 913, 854, 835, 811, 759, 739, 702, 677, 571, 553  $\text{cm}^{-1}$ ; Anal. Calcd. for  $\text{C}_{20}\text{H}_{14}\text{N}_8$ : C, 65.56; H, 3.85; N, 30.58. Found: C, 65.67; H, 3.89; N, 30.45; UV (DMSO)  $\lambda_{\text{max}}$ , nm: 296.

**4,4'-bis(2-phenyl-2H-tetrazol-5-yl)-1,1'-biphenyl (2).** A mixture of (1,1'-biphenyl)-4,4'-dicarbaldehyde (2.50 g, 12 mmol) and *p*-Toluenesulfonyl hydrazide (4.43 g, 24 mmol) in EtOH (80 mL) was heated at reflux under stirring for 5 h. After cooling to r.t., the mixture was poured into cold water. The precipitate formed was recovered by filtration and dried at 80°C overnight. The precipitate was then dissolved in 90 mL of pyridine to give solution A. In parallel, a solution of  $\text{NaNO}_2$  (1.65 g, 24 mmol) in water (6 mL) was added dropwise to a cooled (0 °C) mixture of aniline (2.22 g, 24 mmol), concentrated HCl (37% in  $\text{H}_2\text{O}$ , 6 mL, 72 mmol),  $\text{H}_2\text{O}$  (10 mL) and EtOH (10 mL) to give solution B. Solution A was cooled with an ice bath and solution B was then slowly added. The mixture was stirred overnight at r.t.. The mixture was then poured into an aqueous HCl solution (400 mL, 3 M) and the precipitate was recovered by filtration. Crystallization (MeOH) afforded **2** in a pure form (2.39 g, 45%). Pink solid; m.p.: 186–187 °C dec;  $^1\text{H}$  NMR (400 MHz,  $\text{DMSO}-d_6$ )  $\delta$  8.34 (d,  $J$  = 8.0 Hz, 4H), 8.21 (d,  $J$  = 7.6 Hz, 4H), 8.07 (d,  $J$  = 8.0 Hz, 4H), 7.73 (t,  $J$  = 7.5 Hz, 4H), 7.67 (t,  $J$  = 7.2 Hz, 2H); IR (ATR): 3065, 3032, 2050, 1697, 1615, 1597, 1535, 1494, 1458, 1431, 1409, 1374, 1360, 1318, 1293, 1253, 1210, 1184, 1165, 1139, 1106, 1087, 1075, 1033, 1013, 992, 909, 863, 825, 748, 731, 715, 692, 675, 575  $\text{cm}^{-1}$ ; Anal. Calcd. for  $\text{C}_{26}\text{H}_{18}\text{N}_8$ : C, 70.58; H, 4.10; N, 25.32. Found: C, 70.70; H, 4.07; N, 25.21; UV (DMSO)  $\lambda_{\text{max}}$ , nm: 312.

**5-phenyl-2H-tetrazole (6).** A mixture of Benzonitrile (2.50 g, 24 mmol), sodium azide (1.73 g, 24 mmol) and zinc bromide (5.46 g, 24 mmol) in  $\text{H}_2\text{O}$  (50 mL) was heated at reflux under stirring for 24 h. The mixture was then cooled with an ice bath and acidified with concentrated HCl (37%  $\text{H}_2\text{O}$ ) until pH  $\approx$  1. The mixture was extracted with EtOAc (3X 20 mL), the organic layer was dried ( $\text{Na}_2\text{SO}_4$ ), and the solvent eliminated under reduced pressure. The crude was dissolved aqueous NaOH (200 mL, 0.25 M). The zinc salts formed were filtered off and the aqueous phase was acidified with aqueous HCl (400 mL, 3 M). The precipitate was recovered by filtration and dried at 80°C overnight to afford **6** in a pure form (2.64 g, 76 %). White solid;  $^1\text{H}$  NMR (400 MHz,  $\text{DMSO}-d_6$ )  $\delta$  8.08 – 8.04 (m, 2H), 7.64 – 7.57 (m, 3H); IR (ATR): 3130, 3056, 2980, 2905, 2834, 2794, 2763, 2684, 2649, 2601, 2543, 2480, 2450, 1898, 1857, 1824, 1765, 1713, 1609, 1563, 1485, 1466, 1439, 1409, 1288, 1256, 1084, 1055, 1035, 1015, 989, 956, 925, 840, 790, 784, 725, 703, 685  $\text{cm}^{-1}$ . The physical and spectroscopic data corresponded to those reported in the literature [64].

**1,6-bis(5-phenyl-2H-tetrazol-2-yl)hexane (3).** 5-phenyl-2H-tetrazole **6** (0.76 g, 5.2 mmol) was dissolved in dry DMF (15 mL), under nitrogen atmosphere. K<sub>2</sub>CO<sub>3</sub> (0.79 g, 5.7 mmol) was added in one portion and 1,6-dibromohexane (0.40 mL, 2.6 mmol) was added dropwise over a period of 10 min. The mixture was stirred at r.t. for 48 h. The mixture was then extracted with EtOAc (2X 20 mL), the organic layer was washed with brine (2X 20 mL), dried (Na<sub>2</sub>SO<sub>4</sub>) and the volatiles eliminated under reduced pressure. Flash column chromatography (SiO<sub>2</sub>, CH<sub>2</sub>Cl<sub>2</sub>) afforded **3** in a pure form (0.51 g, 52%). White solid; m.p.: 210-211 °C dec; <sup>1</sup>H NMR (400 MHz, CDCl<sub>3</sub>) δ 8.17 – 8.11 (m, 4H), 7.52 – 7.45 (m, 6H), 4.65 (t, *J* = 7.0 Hz, 4H), 2.13 – 2.02 (m, *J* = 7.2 Hz, 4H), 1.49 – 1.42 (m, 4H); <sup>13</sup>C NMR (101 MHz, CDCl<sub>3</sub>) δ 165.1, 130.3, 128.9, 127.4, 126.8, 52.9, 29.1, 25.7; IR (ATR): 3067, 3034, 2947, 2872, 2863, 2165, 1981, 1962, 1895, 1822, 1767, 1716, 1653, 1610, 1585, 1528, 1463, 1449, 1397, 1365, 1352, 1339, 1306, 1286, 1251, 1206, 1177, 1131, 1103, 1070, 1042, 1030, 1000, 997, 921, 855, 787, 759, 729, 689, 617 cm<sup>-1</sup>; Anal. Calcd. for C<sub>20</sub>H<sub>22</sub>N<sub>8</sub>: C, 64.15; H, 5.92; N, 29.93. Found: C, 64.36; H, 5.89; N, 29.82; UV (DMSO) λ<sub>max</sub>, nm: <265.

**4-(5-(thiophen-2-yl)-2H-tetrazol-2-yl)phenol (7).** A mixture of 2-Thiophenecarboxaldehyde (1.00 g, 8.9 mmol) and *p*-Toluenesulfonyl hydrazide (1.66 g, 8.9 mmol) in EtOH (25 mL) was heated at reflux under stirring for 5 h. After cooling to r.t., the mixture was poured into cold water. The precipitate formed was recovered by filtration and dried at 80°C overnight. The precipitate was then dissolved in 90 mL of pyridine to give solution A. In parallel, a solution of NaNO<sub>2</sub> (0.62 g, 8.9 mmol) in water (3 mL) added dropwise to a cooled (0 °C) mixture of 4-aminophenol (0.97 g, 8.92 mmol), concentrated HCl (37% in H<sub>2</sub>O, 2 mL, 27 mmol), H<sub>2</sub>O (5 mL) and EtOH (5 mL) to give solution B. Solution A was cooled with an ice bath and solution B was then slowly added. The mixture was stirred overnight at r.t.. The mixture was then poured into an aqueous HCl solution (200 mL, 3 M) and the precipitate was recovered by filtration. Flash column chromatography (SiO<sub>2</sub>, CH<sub>2</sub>Cl<sub>2</sub>/EtOAc 95:5) afforded **2** in a pure form (2.39 g, 45%). Yellow solid; m.p. 160-161 °C dec; <sup>1</sup>H NMR (400 MHz, CDCl<sub>3</sub>) δ 8.08 – 8.02 (m, 2H), 7.89 (dd, *J* = 3.6, 1.1 Hz, 1H), 7.49 (dd, *J* = 5.0, 1.1 Hz, 1H), 7.19 (dd, *J* = 5.0, 3.7 Hz, 1H), 7.04 – 6.99 (m, 2H), 5.38 (br. s, 1H); <sup>13</sup>C NMR (101 MHz, CDCl<sub>3</sub>) δ 161.3, 156.8, 130.4, 128.9, 128.1, 128.1, 128.0, 121.7, 116.2; IR (ATR): 3177, 3108, 3093, 2983, 2952, 2925, 2847, 2701, 2632, 1883, 1811, 1743, 1680, 1644, 1618, 1600, 1575, 1569, 1516, 1474, 1410, 1368, 1340, 1328, 1281, 1254, 1230, 1221, 1201, 1187, 1168, 1124, 1106, 1089, 1074, 1053, 1018, 1005, 971, 939, 908, 851, 833, 747, 714, 705, 688, 669, 635, 628, 572 cm<sup>-1</sup>

**1,4-bis(4-(5-(thiophen-2-yl)-2H-tetrazol-2-yl)phenoxy)butane (4).** **7** (0.40 g, 1.7 mmol) was dissolved in dry DMF (10 mL), under nitrogen atmosphere. K<sub>2</sub>CO<sub>3</sub> (0.25 g, 1.8 mmol) was added in one portion and 1,4-dibromobutane (0.1 mL, 0.83 mmol) was added dropwise over a period of 10 min. The mixture was stirred r.t. for 72 h. The mixture was then extracted with EtOAc (2X 15 mL), the organic layer was washed with brine (2X 10 mL), dried (Na<sub>2</sub>SO<sub>4</sub>) and the volatiles eliminated under reduced pressure. Flash column chromatography (SiO<sub>2</sub>, CH<sub>2</sub>Cl<sub>2</sub>) afforded **4** in a pure form (0.39 g, 87%). Yellow solid; m.p.: 190-191 °C dec; <sup>1</sup>H NMR (400 MHz, CDCl<sub>3</sub>) δ 8.10 – 8.05 (m, 4H), 7.89 (dd, *J* = 3.7, 1.2 Hz, 2H), 7.49 (dd, *J* = 5.0, 1.2 Hz, 2H), 7.18 (dd, *J* = 5.0, 3.7 Hz, 2H), 7.06 – 7.01 (m, 4H), 4.08 (t, *J* = 6.0 Hz, 4H), 2.04 – 1.96 (m, 4H); <sup>13</sup>C NMR (101 MHz, CDCl<sub>3</sub>) δ 161.1, 159.8, 130.3, 128.9, 128.1, 127.9, 67.3, 27.8; IR (ATR): 3075, 2957, 2939, 2869, 1980, 1888, 1808, 1732, 1609, 1600, 1570, 1517, 1471, 1437, 1431, 1406, 1397, 1376, 1351, 1302, 1276, 1258, 1225, 1204, 1182, 1114, 1066, 1042, 1015, 1001, 965, 852, 843, 827, 788, 748, 734, 704, 686, 682, 654, 638, 575 cm<sup>-1</sup>; Anal. Calcd. for C<sub>26</sub>H<sub>22</sub>N<sub>8</sub>O<sub>2</sub>S<sub>2</sub>: C, 57.55; H, 4.09; N, 20.65. Found: C, 57.22; H, 4.16; N, 20.71; UV (DMSO) λ<sub>max</sub>, nm: 304.

**1,3,5-tris((4-(5-(thiophen-2-yl)-2H-tetrazol-2-yl)phenoxy)methyl)benzene (5).** **7** (0.40 g, 1.7 mmol) was dissolved in dry DMF (8 mL), under nitrogen atmosphere. K<sub>2</sub>CO<sub>3</sub> (0.13 g, 0.94 mmol) was added in one portion and 1,3,5-tris(bromomethyl)benzene (0.83g, 0.23mmol) was added portionwise over a period of 10 min. The mixture was stirred r.t. for 72 h. The mixture was then extracted with EtOAc (2X 15 mL), the organic layer was washed with brine (2X 10 mL), dried (Na<sub>2</sub>SO<sub>4</sub>) and the volatiles eliminated under reduced pressure. Flash column chromatography (SiO<sub>2</sub>, CH<sub>2</sub>Cl<sub>2</sub>) afforded **5** in a pure form (0.17 g, 87%). White solid; m.p. 192-193 °C dec; <sup>1</sup>H NMR (400 MHz, CDCl<sub>3</sub>) δ 8.12 – 8.07 (m, 6H), 7.88 (dd, *J* = 3.6, 1.2 Hz, 3H), 7.55 (s, 3H), 7.49 (dd, *J* = 5.0, 1.1 Hz, 3H), 7.18 (dd, *J* = 5.0, 3.7 Hz, 3H), 7.16 – 7.11 (m, 6H), 5.22 (s, 6H); <sup>13</sup>C NMR (101 MHz, CDCl<sub>3</sub>) δ 161.2, 159.4, 137.5, 130.6, 128.9, 128.1, 128.0, 126.1, 121.5, 115.6, 69.9; IR (ATR): 3107, 3082, 2925, 2854, 2558, 1885, 1805, 1729, 1680, 1608, 1596, 1572, 1509, 1475, 1457, 1440, 1409, 1373, 1300, 1247, 1225, 1203, 1175, 1112, 1066, 1043, 1012, 1002, 964, 893, 867, 850, 835, 807, 747, 701, 688, 673, 632, 587, 574 cm<sup>-1</sup>; Anal. Calcd. for C<sub>42</sub>H<sub>30</sub>N<sub>12</sub>O<sub>3</sub>S<sub>3</sub>: C, 59.56; H, 3.57; N, 19.85. Found: C, 59.22; H, 3.51; N, 19.94; UV (DMSO) λ<sub>max</sub>, nm: 303.

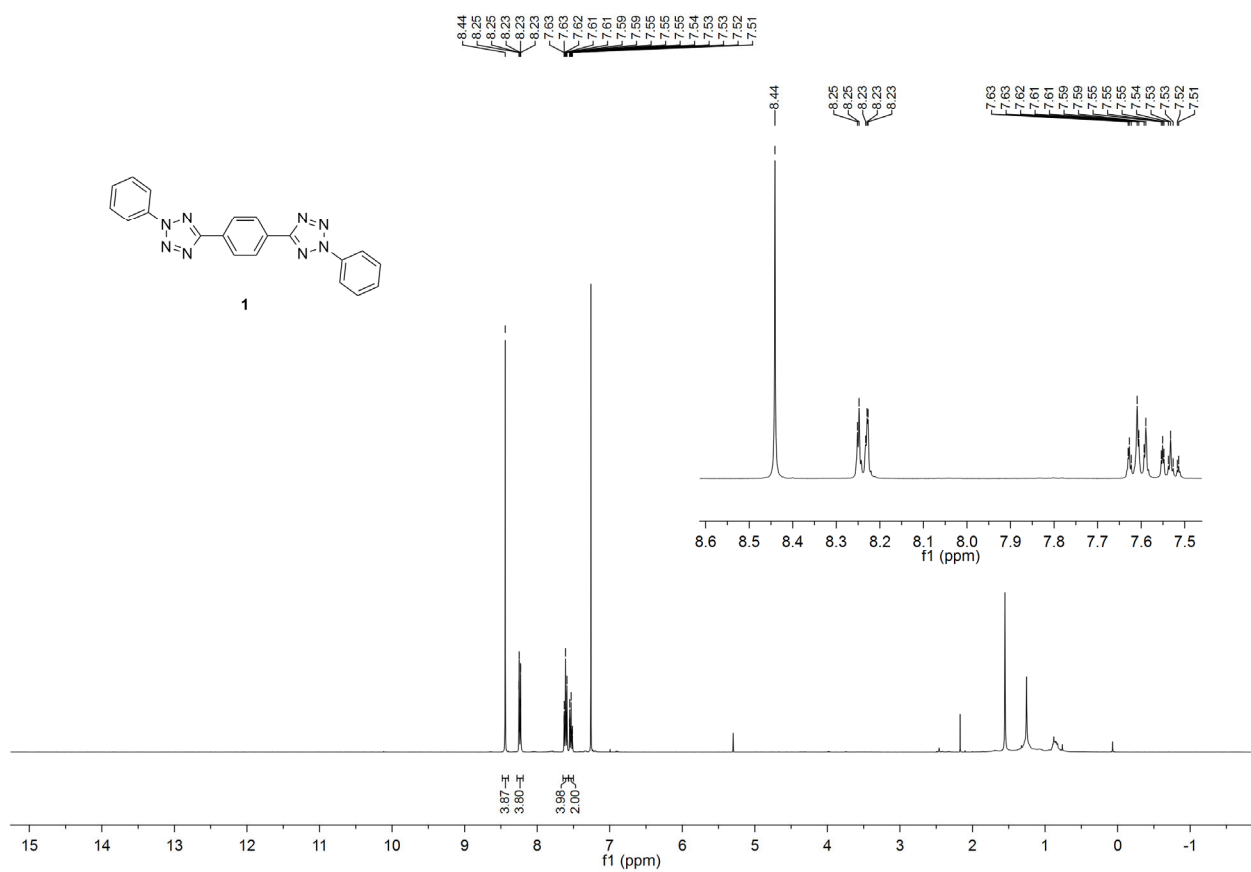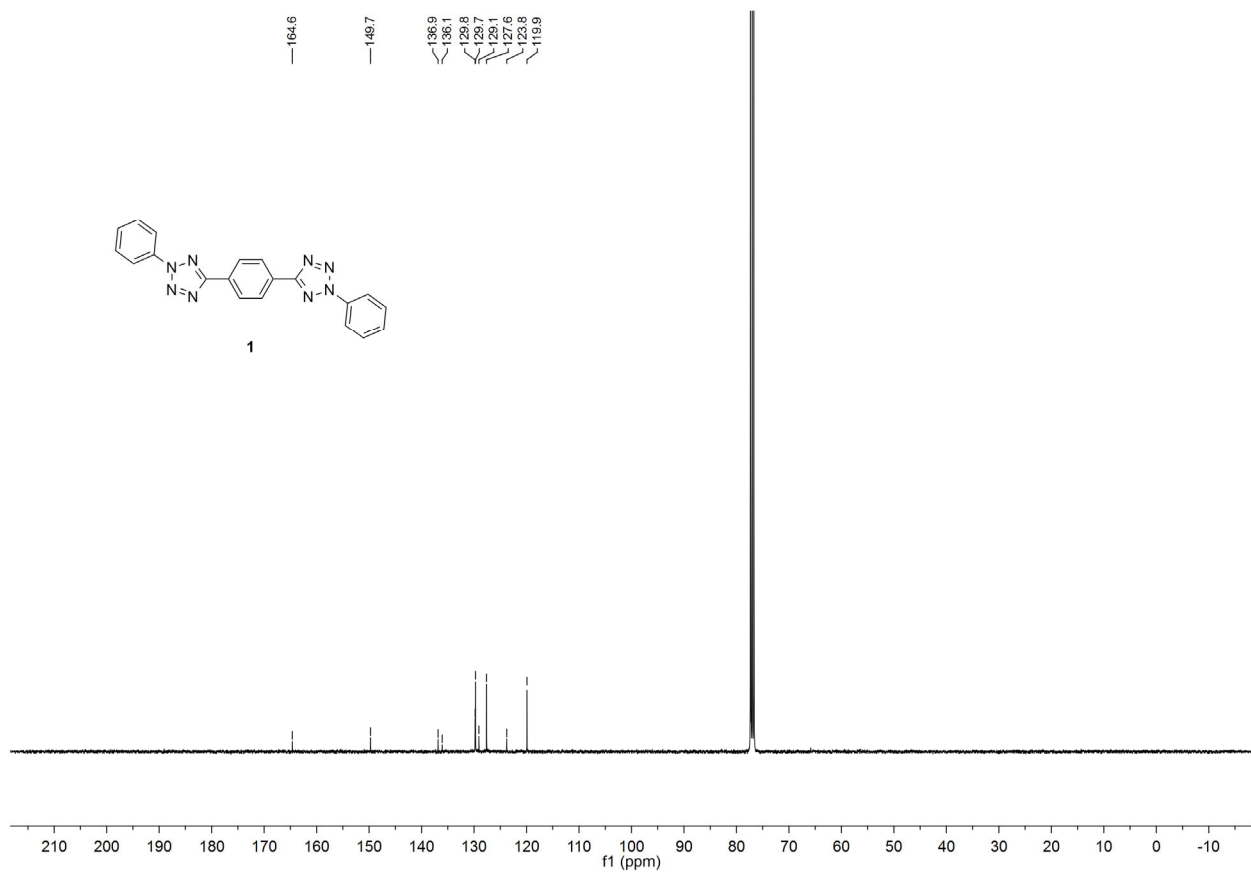

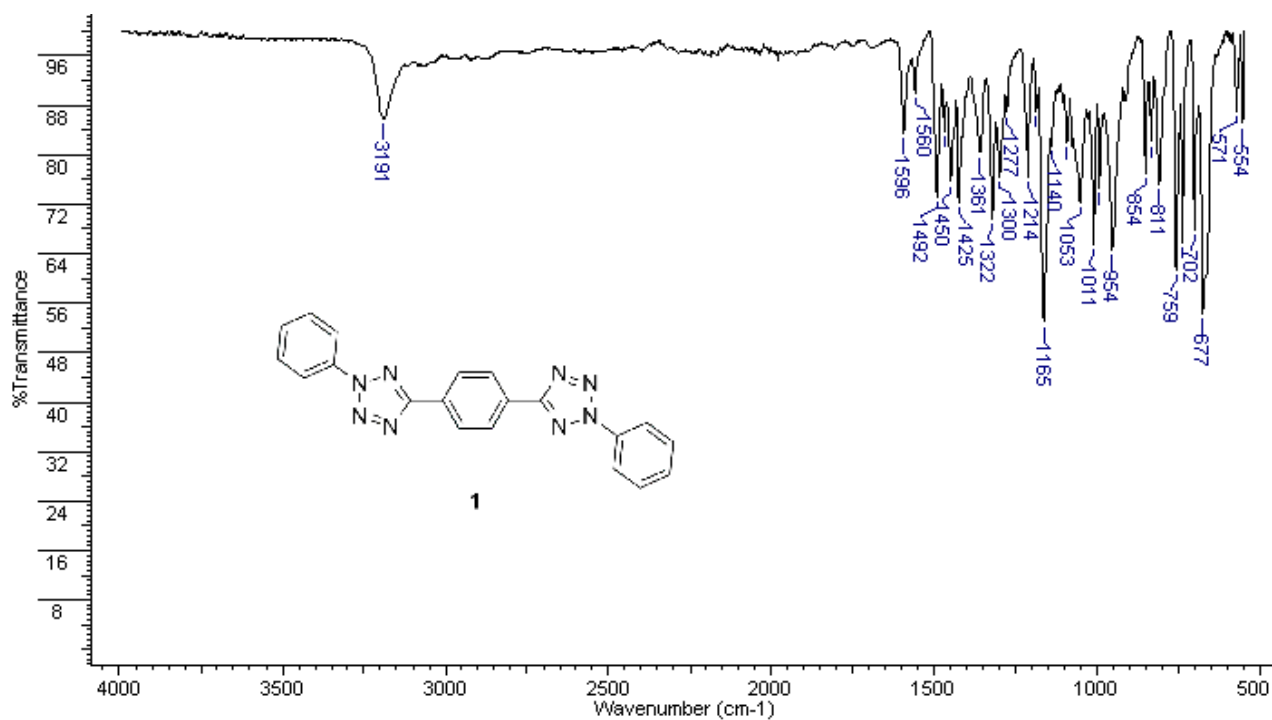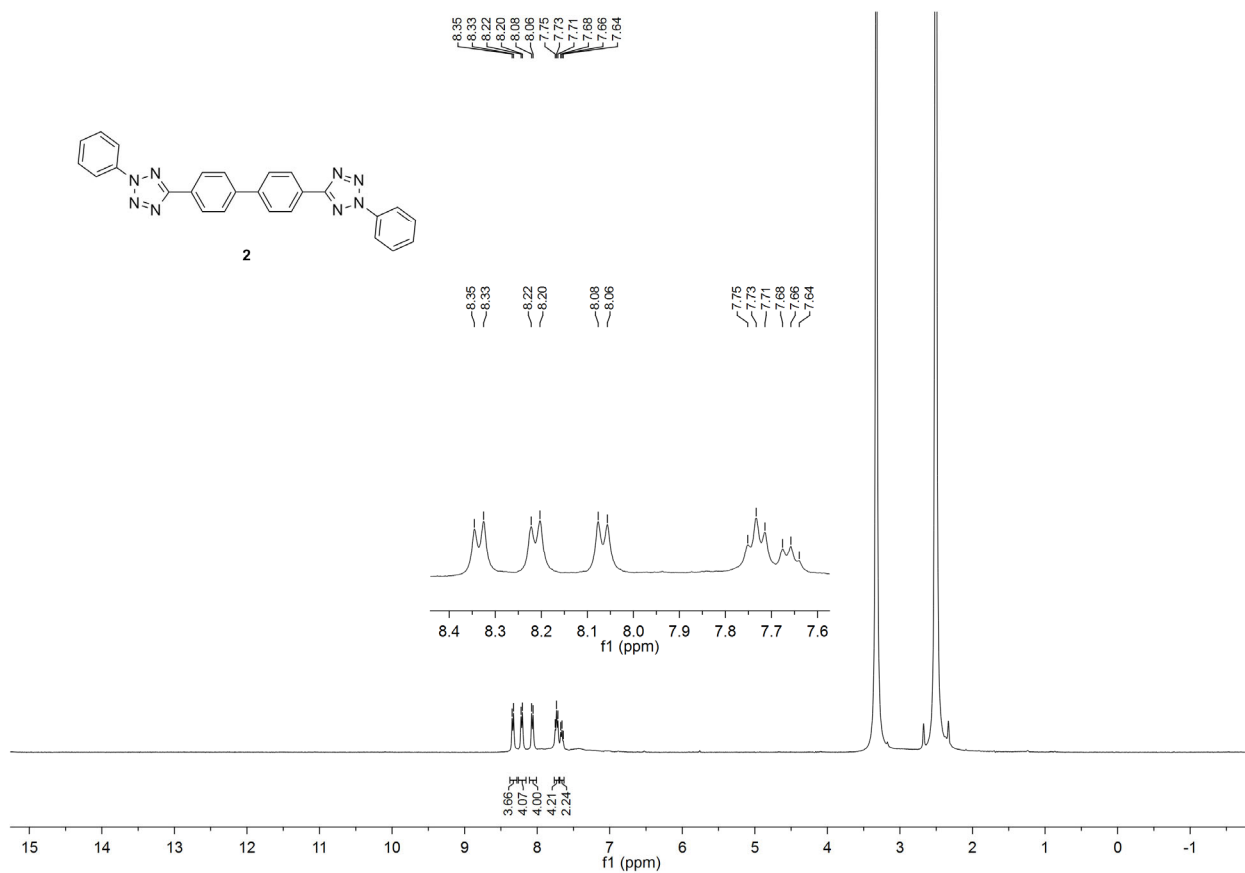

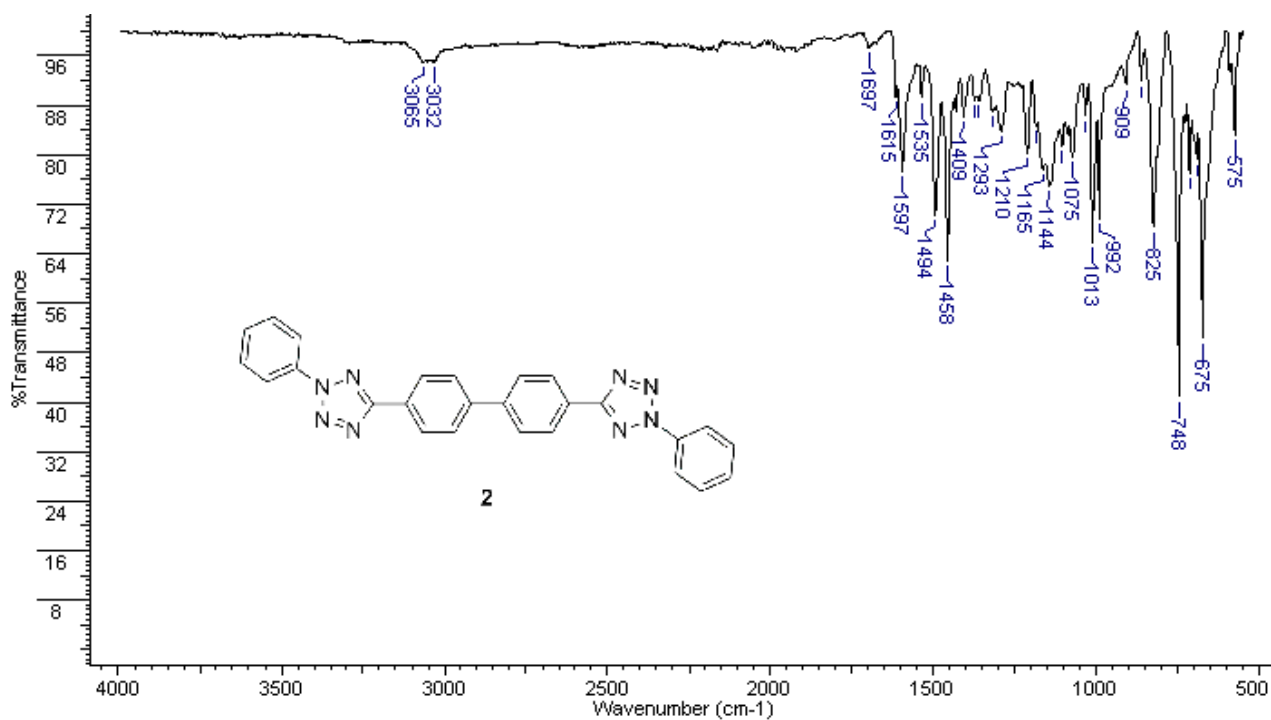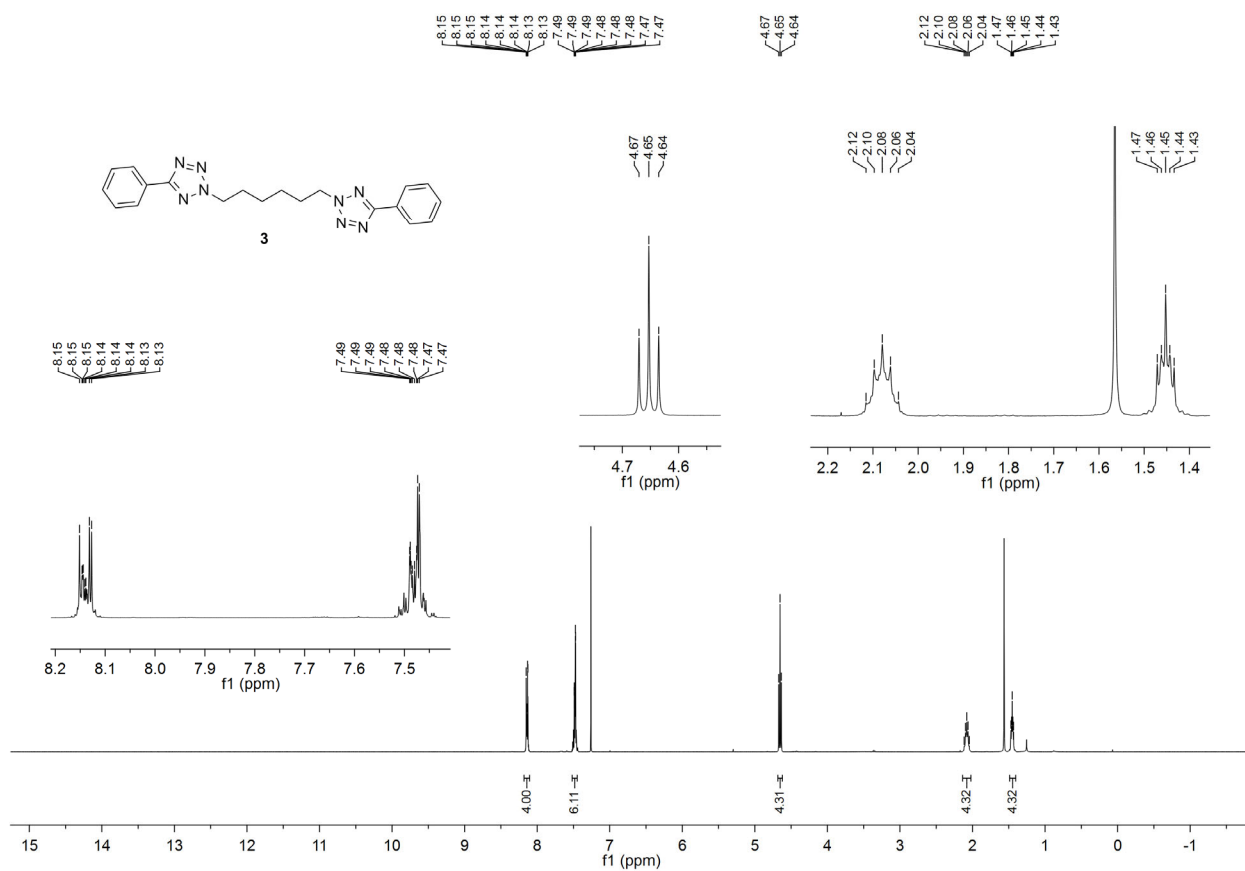

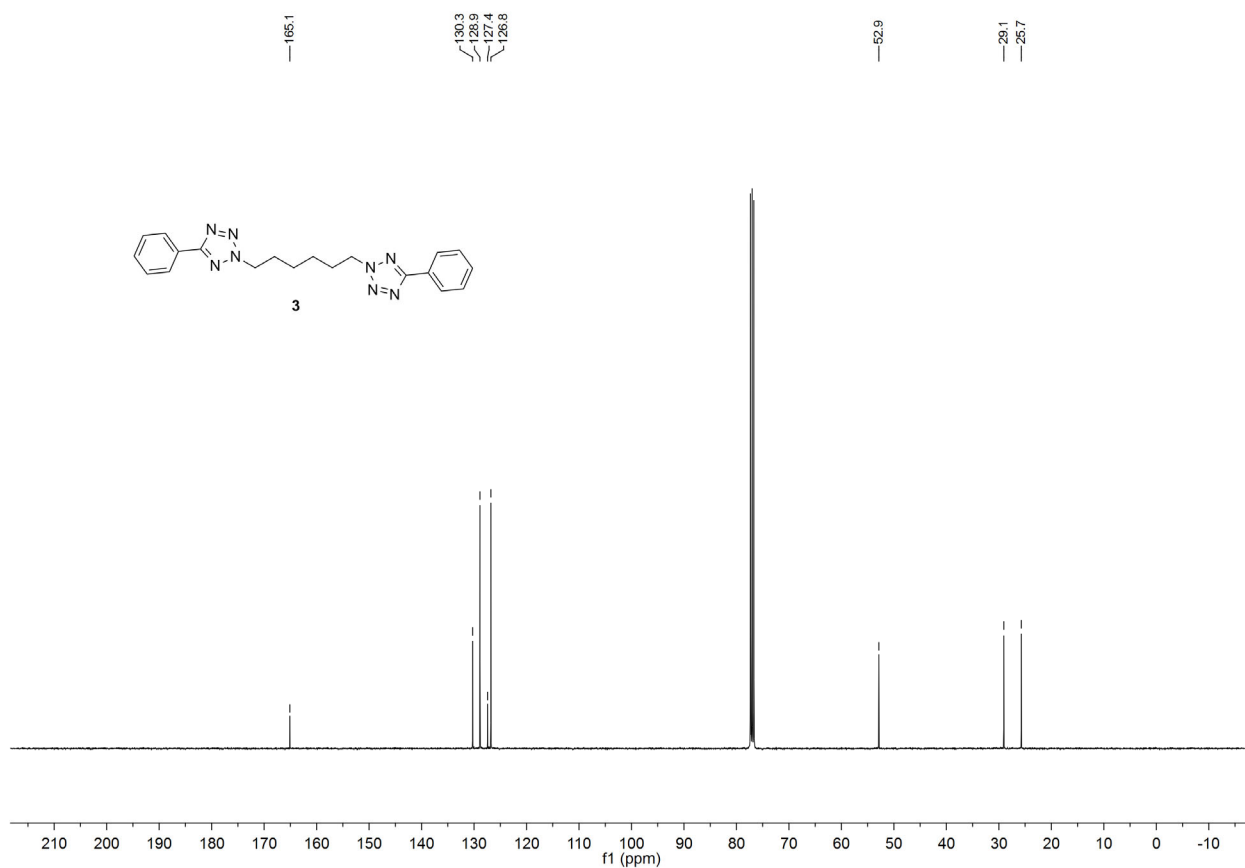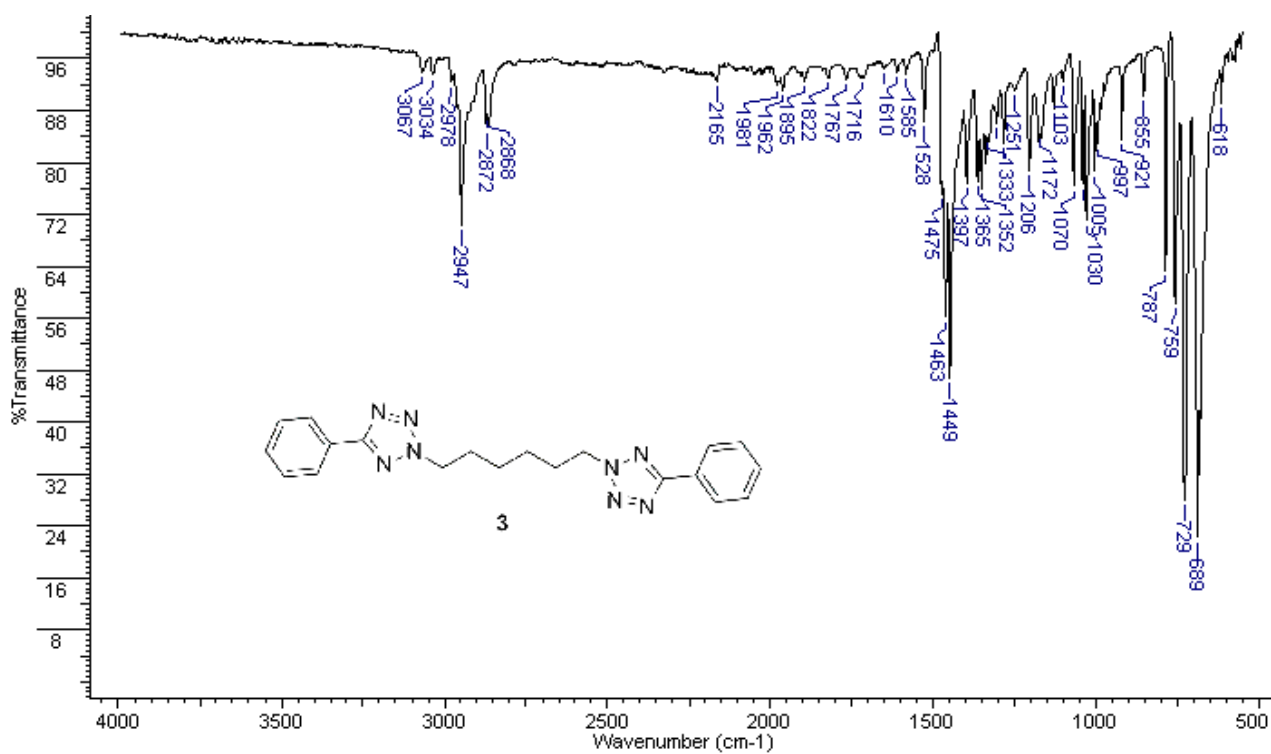

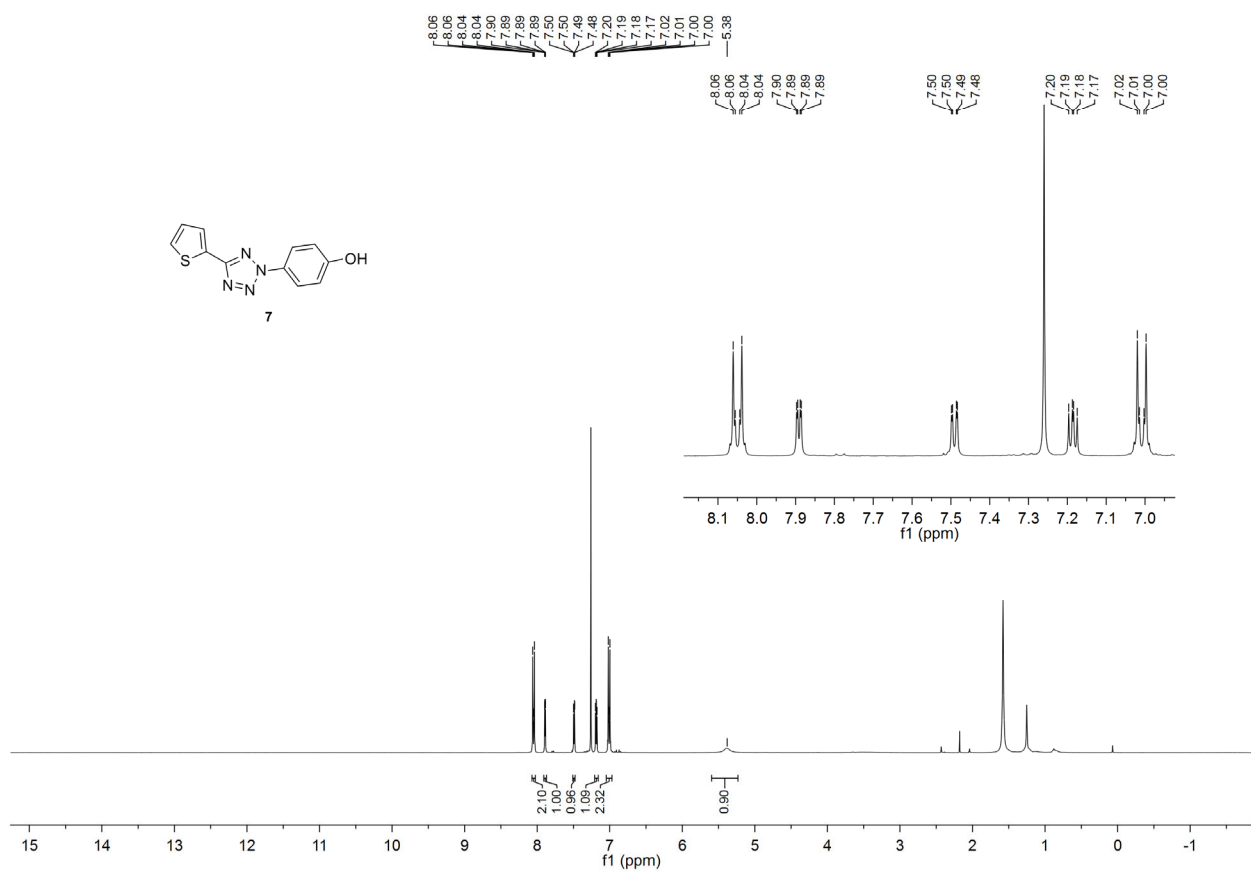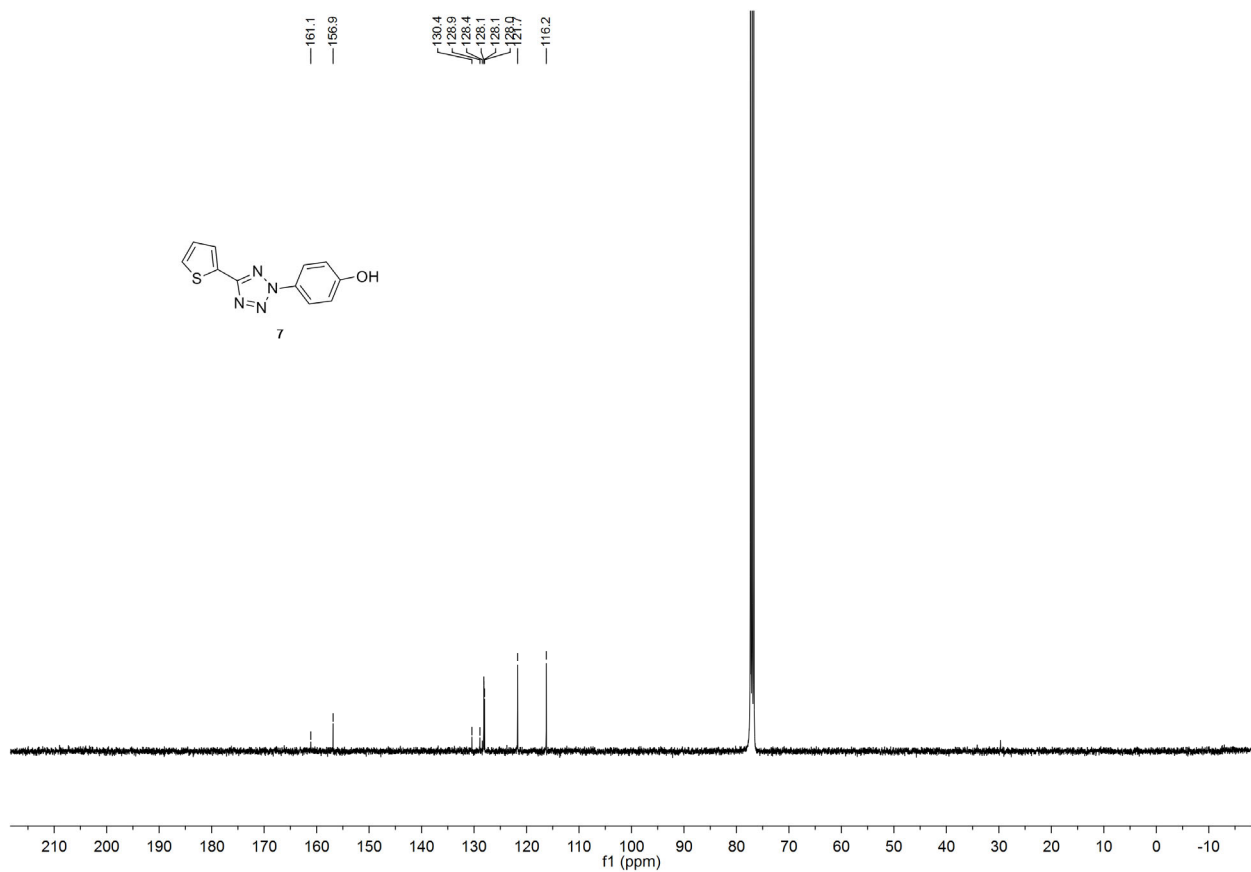

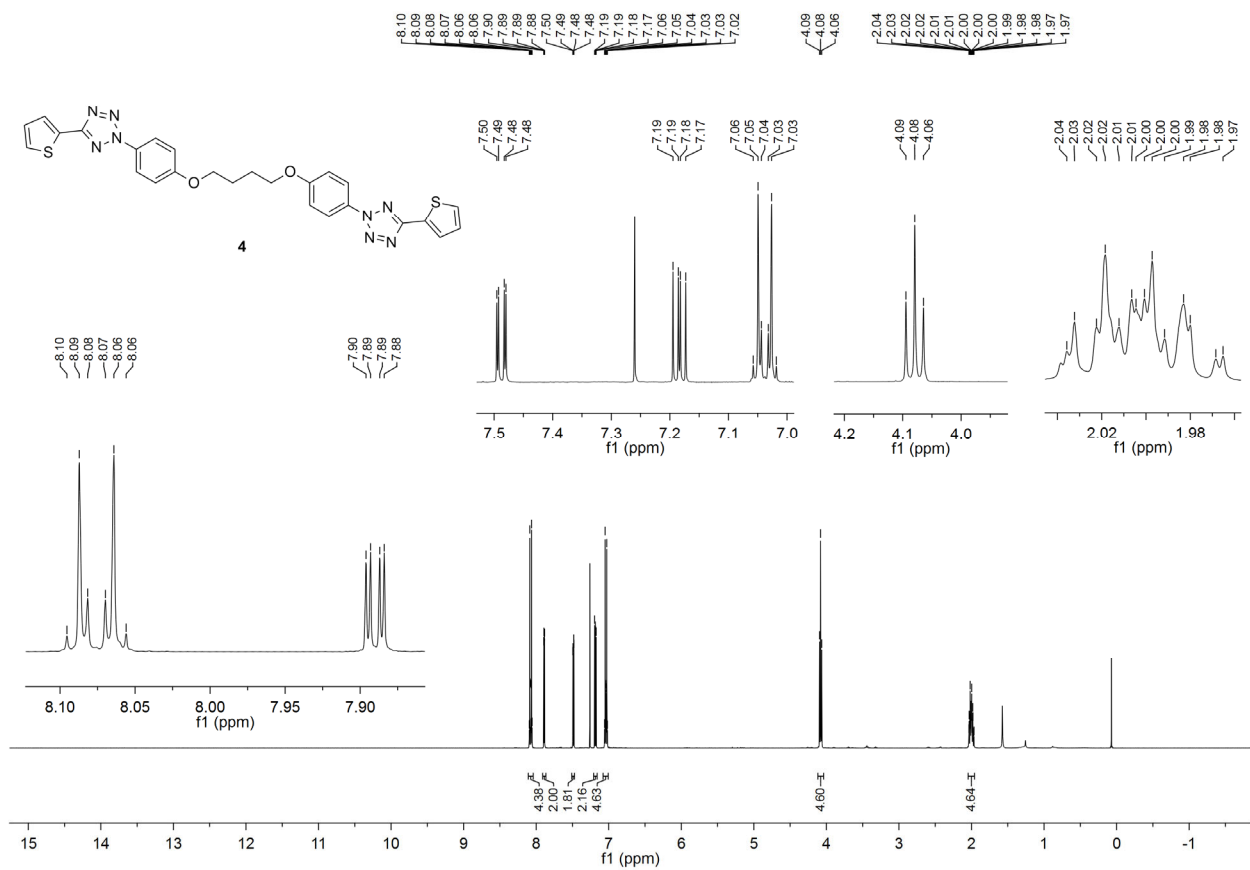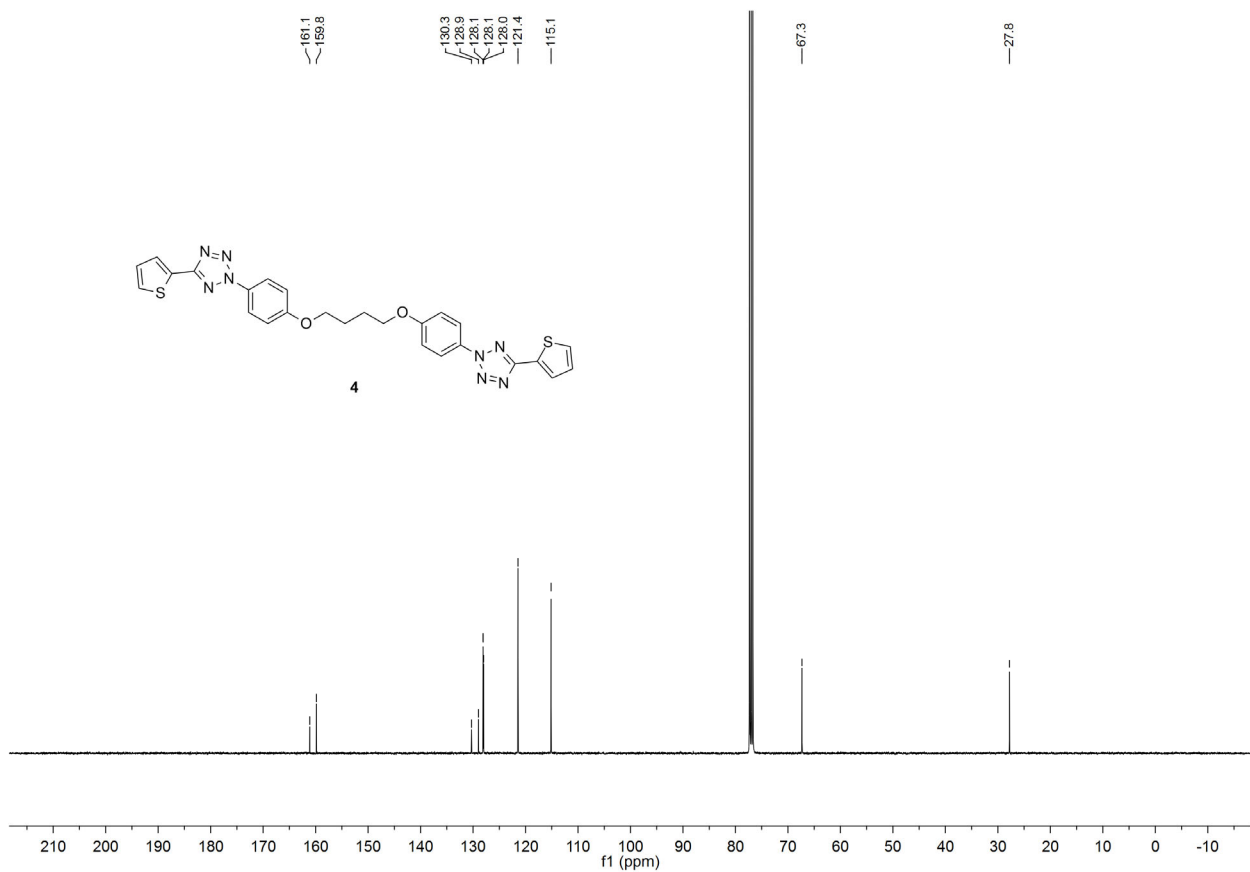

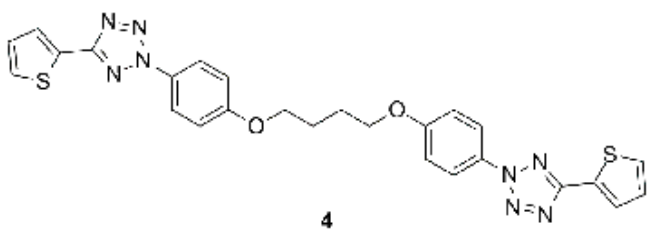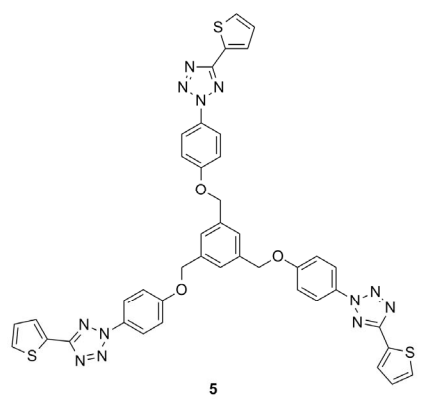

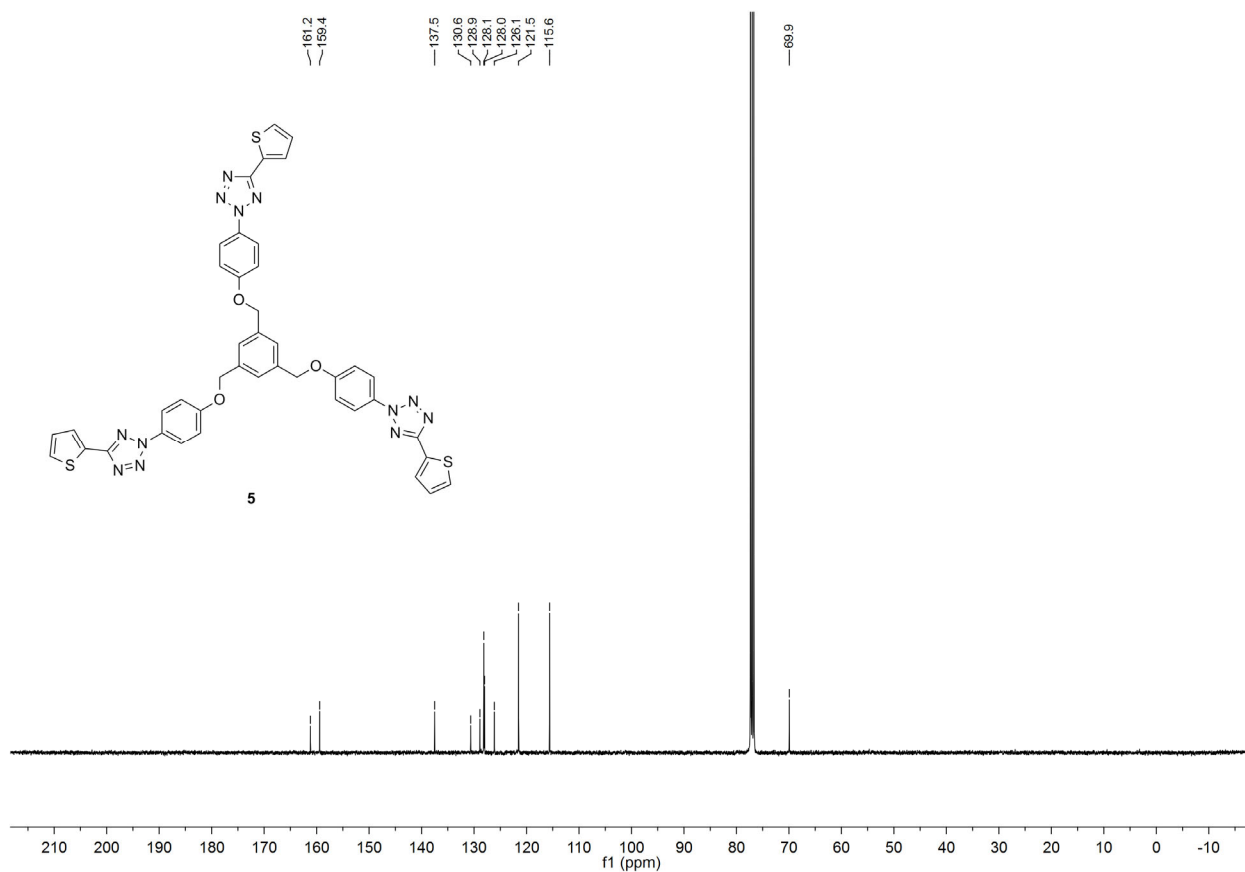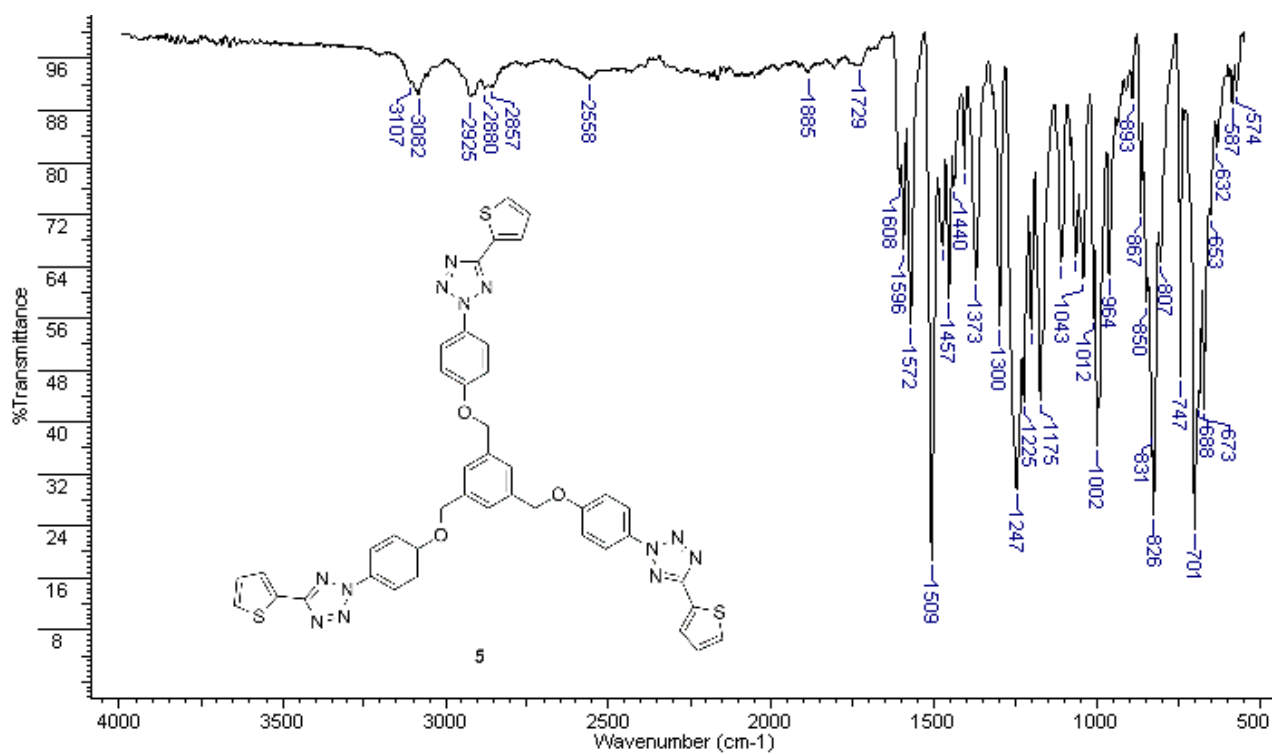

Legend:

|                         |                        |                         |                        |                        |                        |
|-------------------------|------------------------|-------------------------|------------------------|------------------------|------------------------|
| Blank                   | Blank                  | 5<br>10 $\mu\text{mol}$ | 5<br>5 $\mu\text{mol}$ | 5<br>2 $\mu\text{mol}$ | 5<br>1 $\mu\text{mol}$ |
| Blank                   | Blank                  | 3<br>10 $\mu\text{mol}$ | 3<br>5 $\mu\text{mol}$ | 3<br>2 $\mu\text{mol}$ | 3<br>1 $\mu\text{mol}$ |
| 4<br>10 $\mu\text{mol}$ | 4<br>5 $\mu\text{mol}$ | 2<br>10 $\mu\text{mol}$ | 2<br>5 $\mu\text{mol}$ | 2<br>2 $\mu\text{mol}$ | 2<br>1 $\mu\text{mol}$ |
| 4<br>2 $\mu\text{mol}$  | 4<br>1 $\mu\text{mol}$ | 1<br>10 $\mu\text{mol}$ | 1<br>5 $\mu\text{mol}$ | 1<br>2 $\mu\text{mol}$ | 1<br>1 $\mu\text{mol}$ |

$t_0$ :

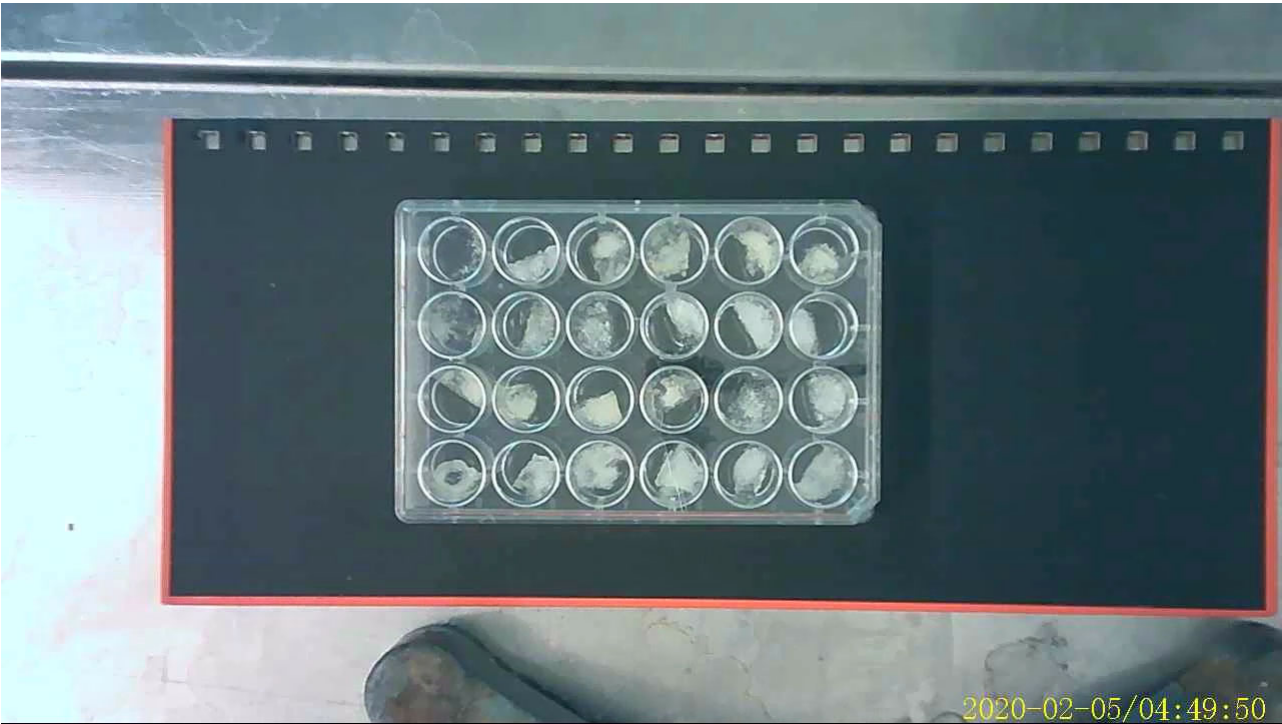

15 min:

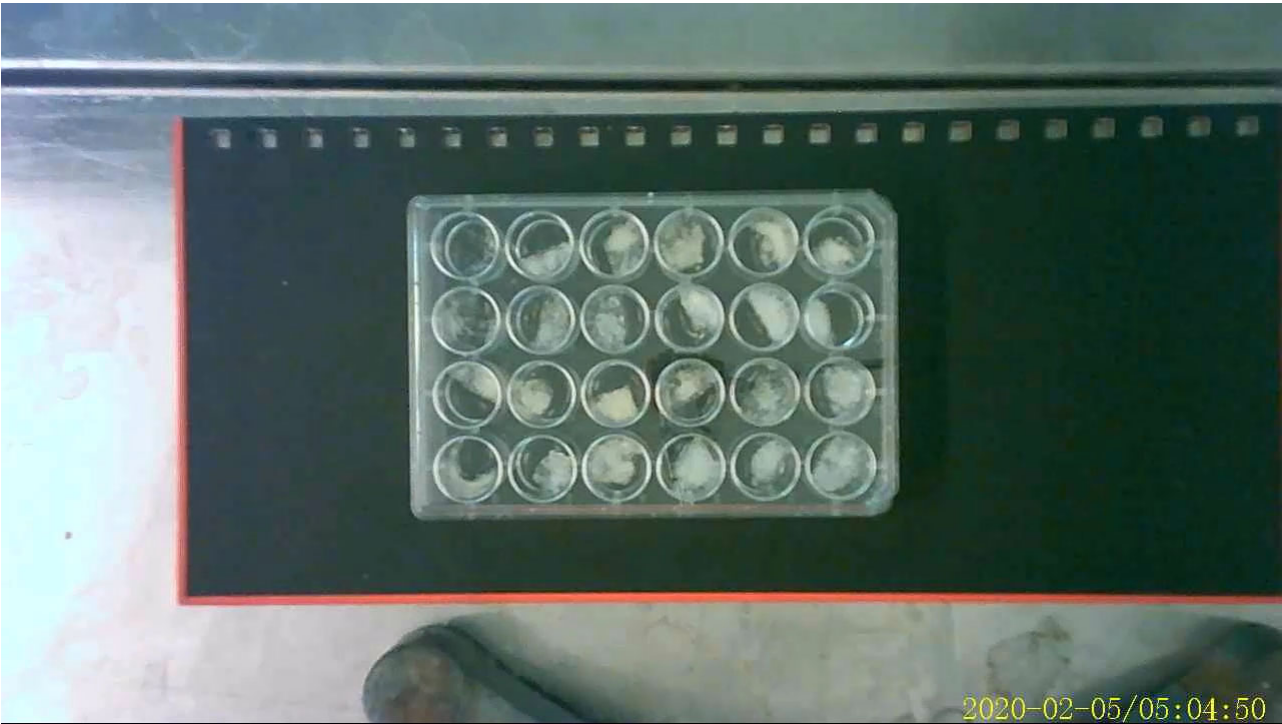

30 min:

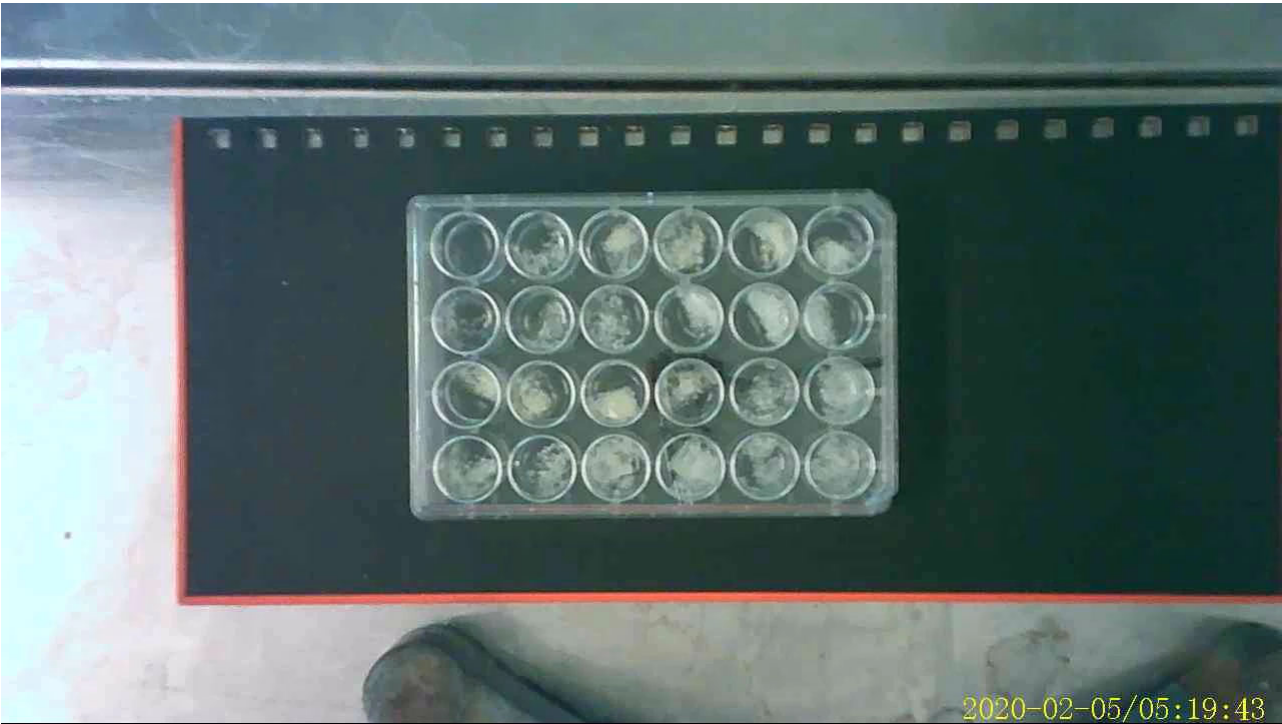

45 min:

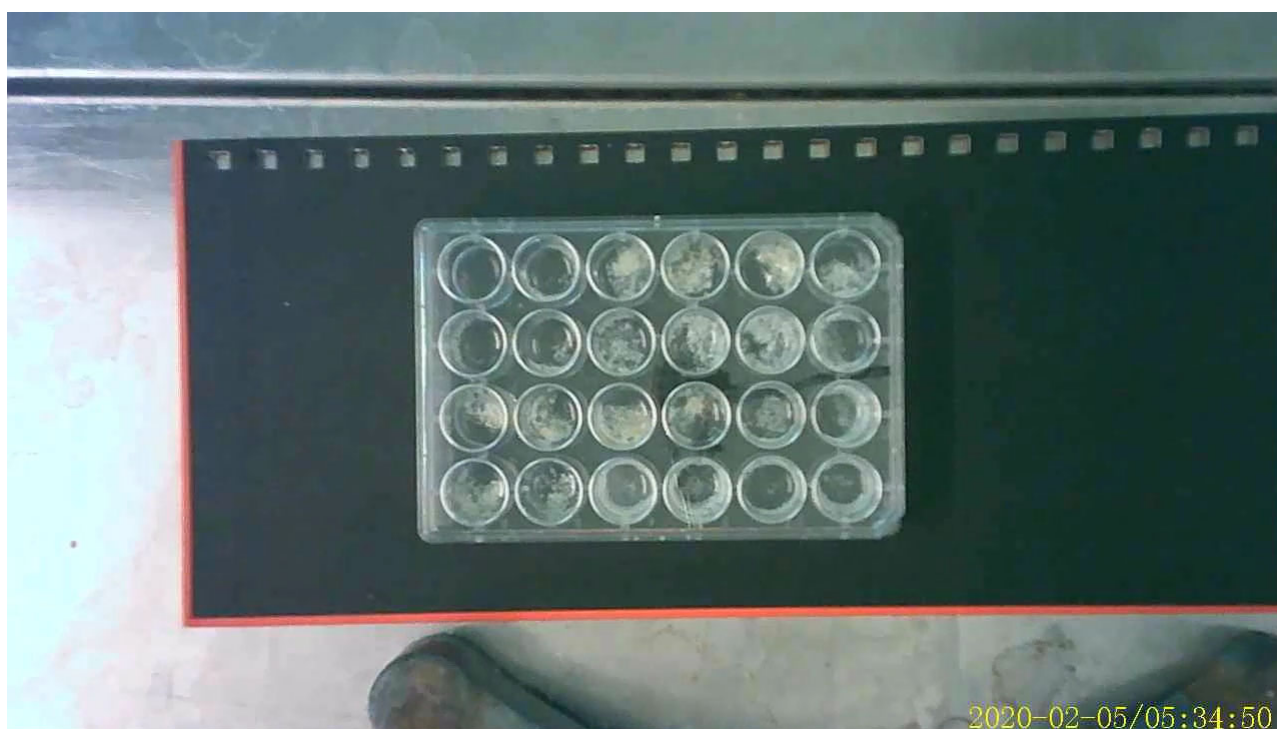

60 min:

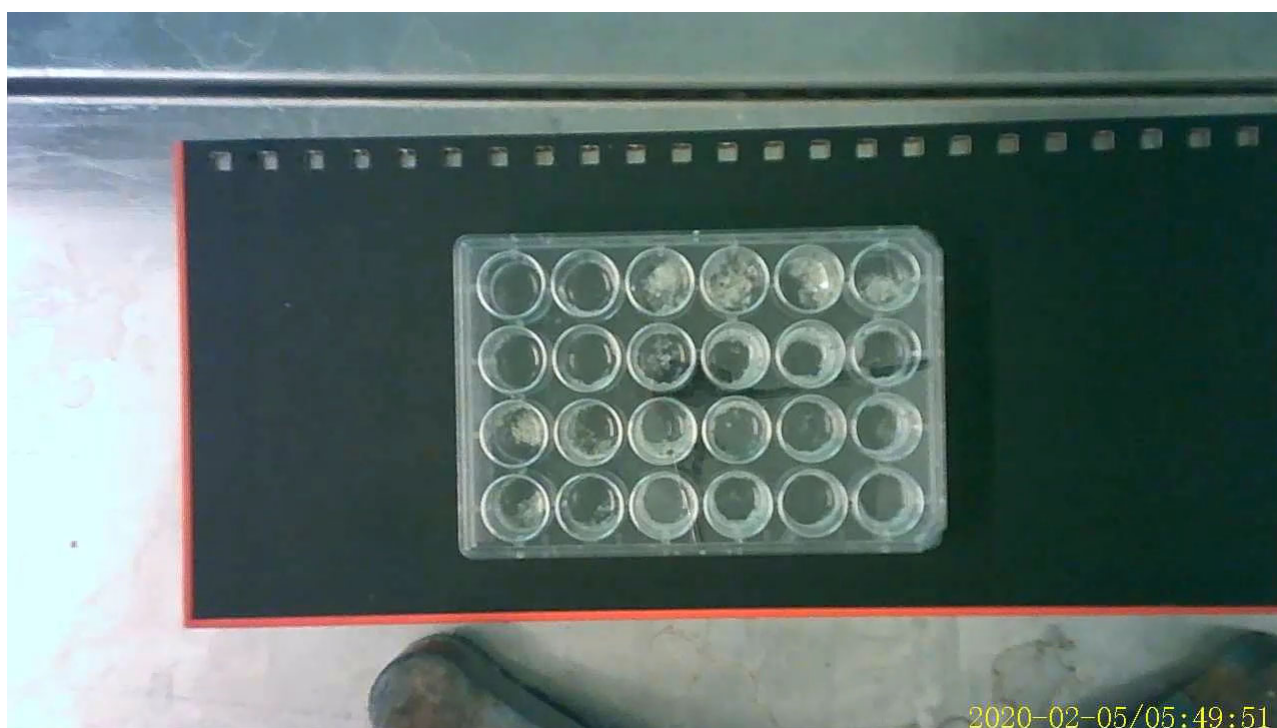

75 min:

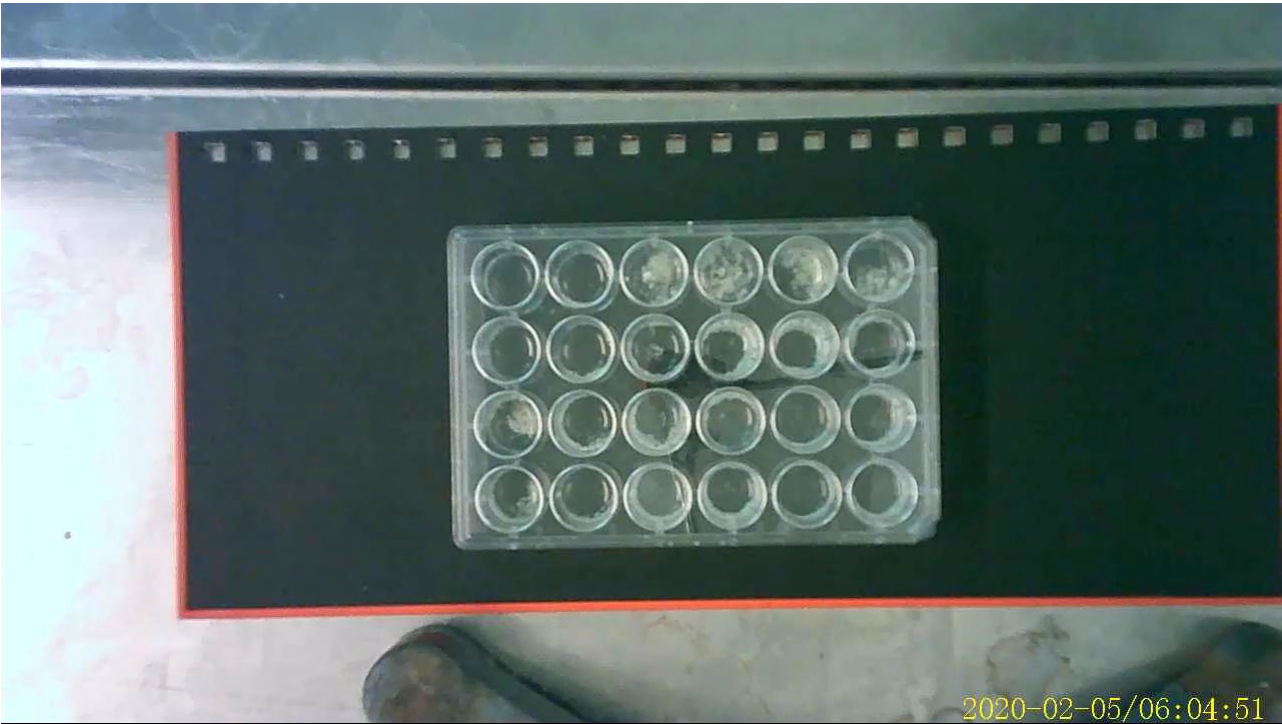

90 min:

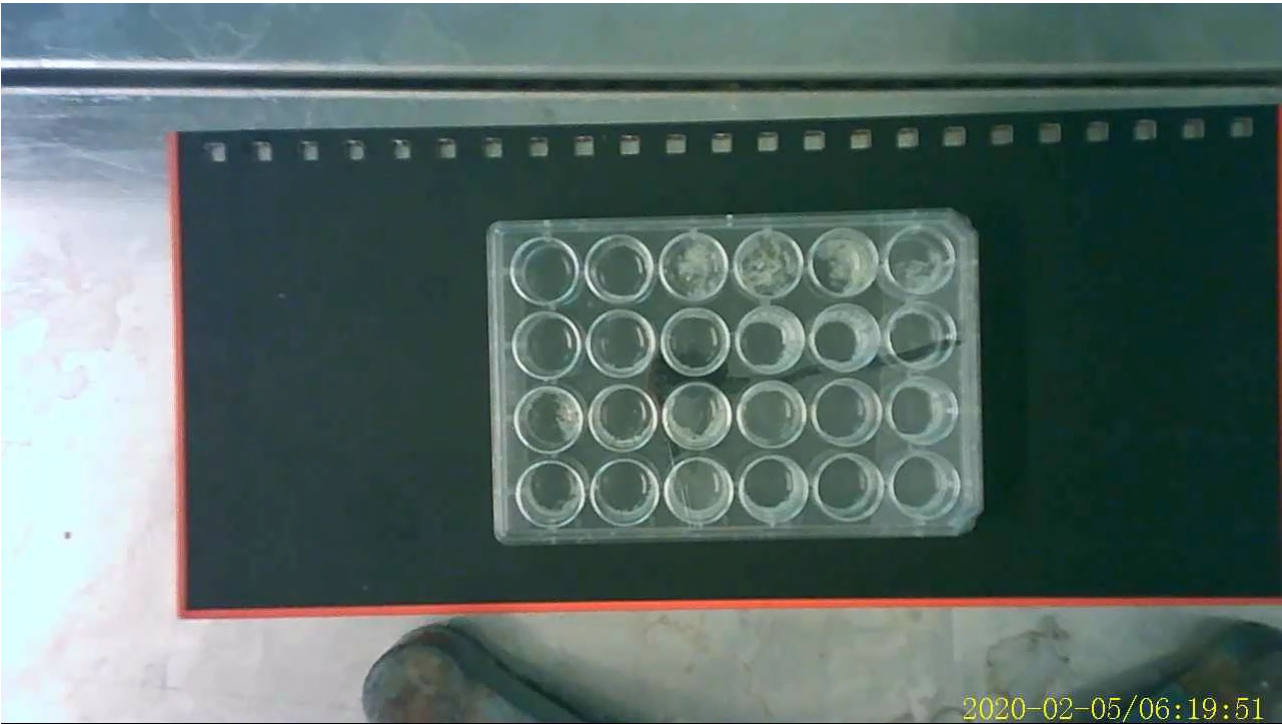

105 min:

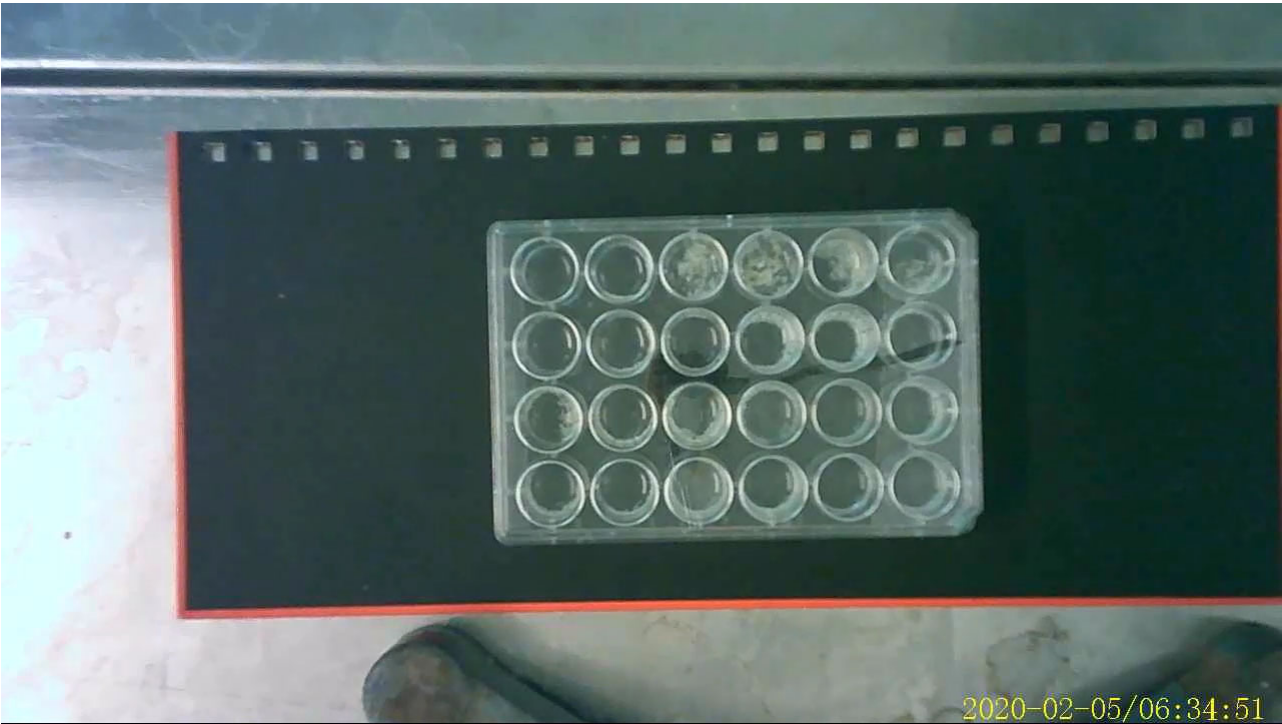

120 min:

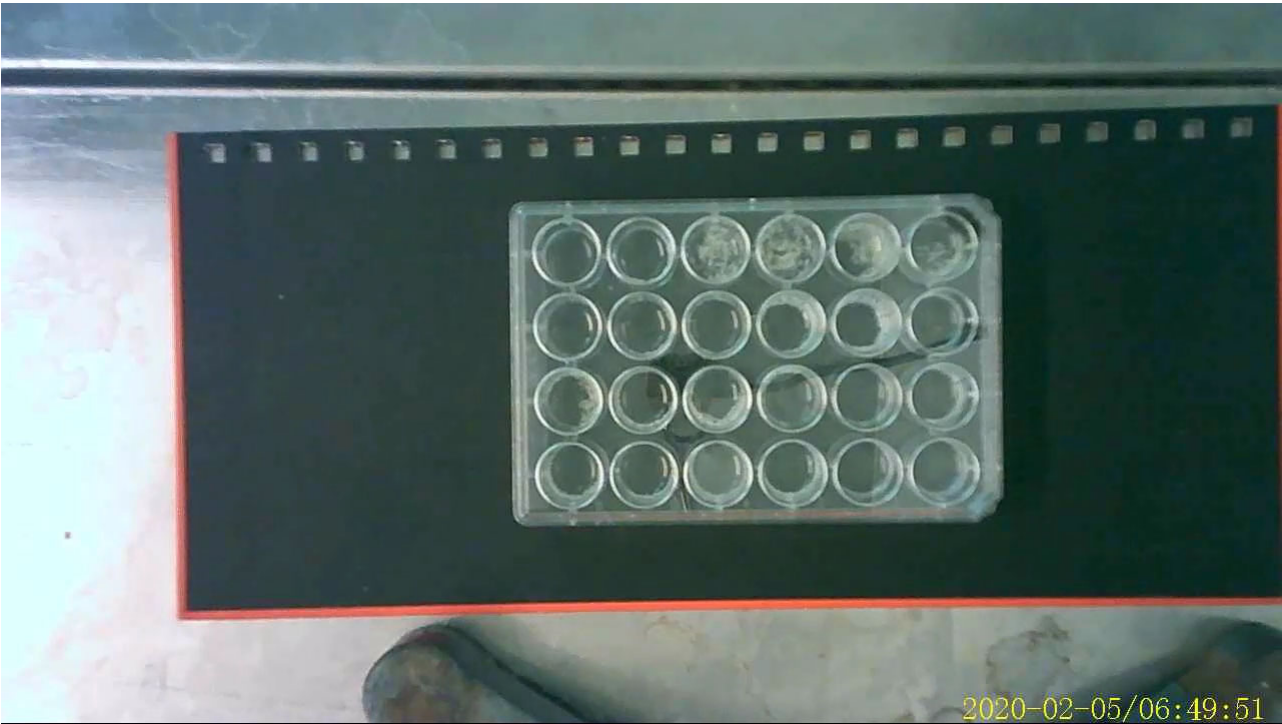

135 min:

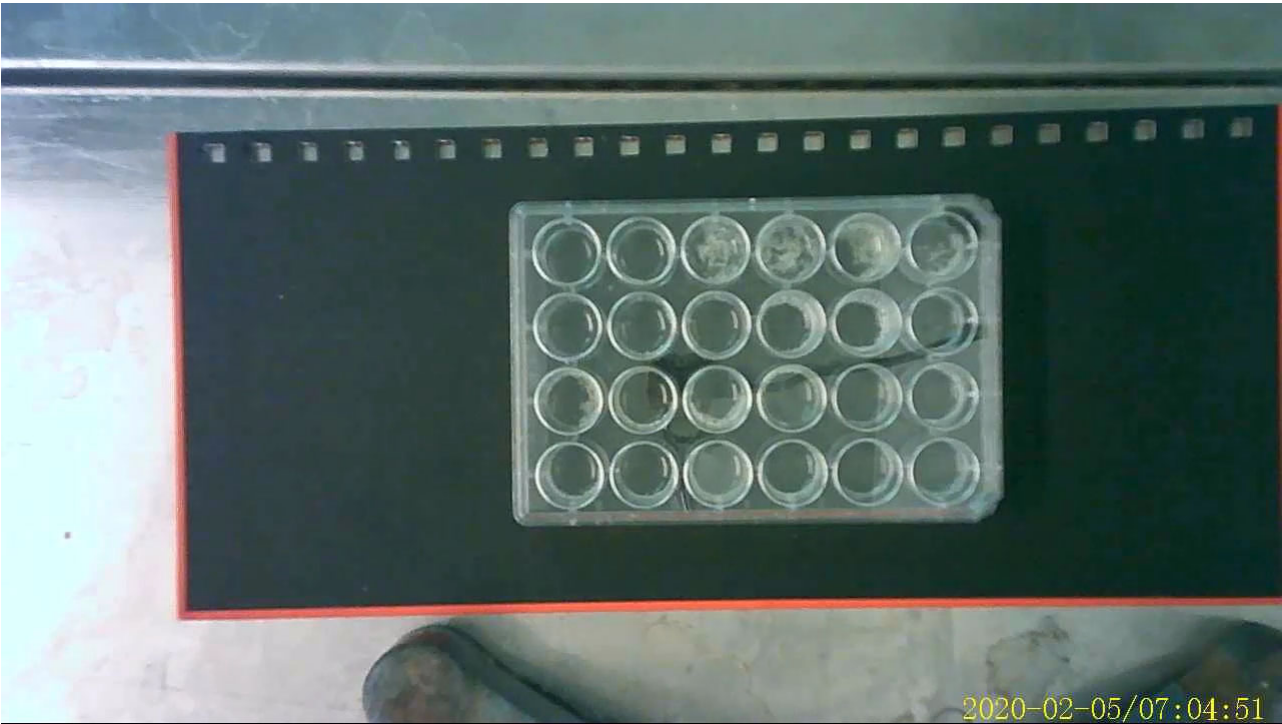

150 min:

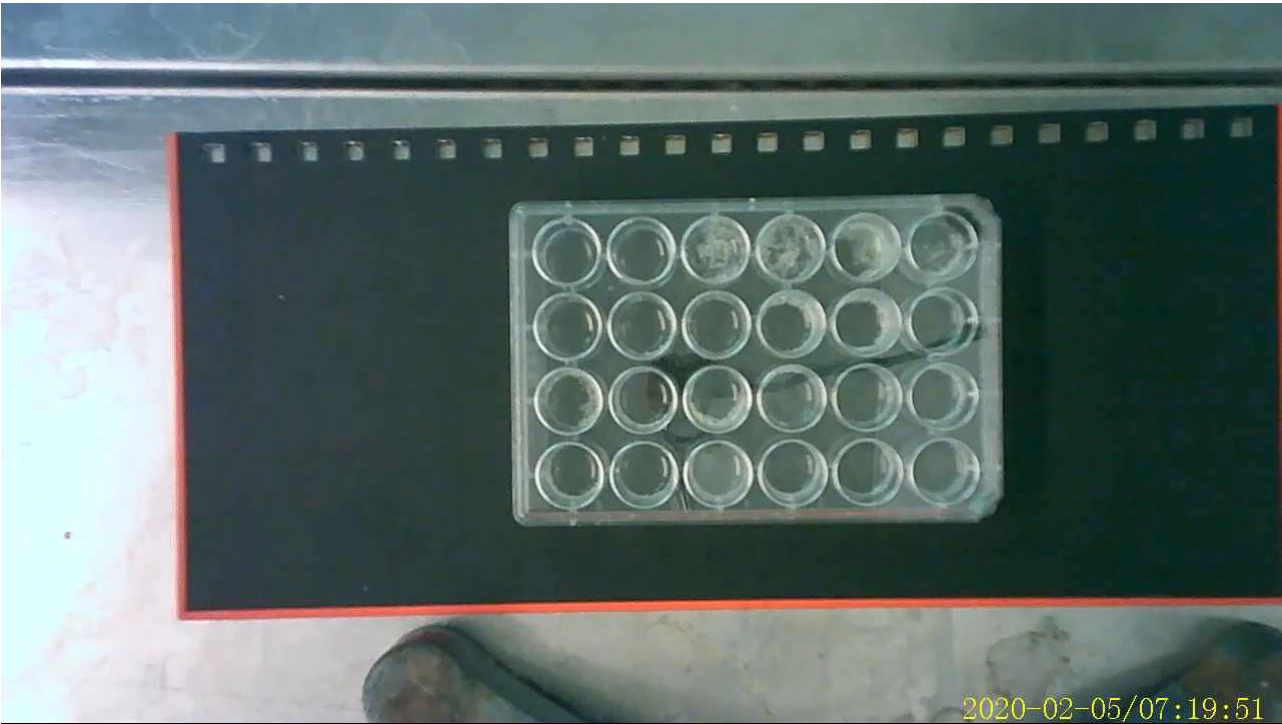

165 min:

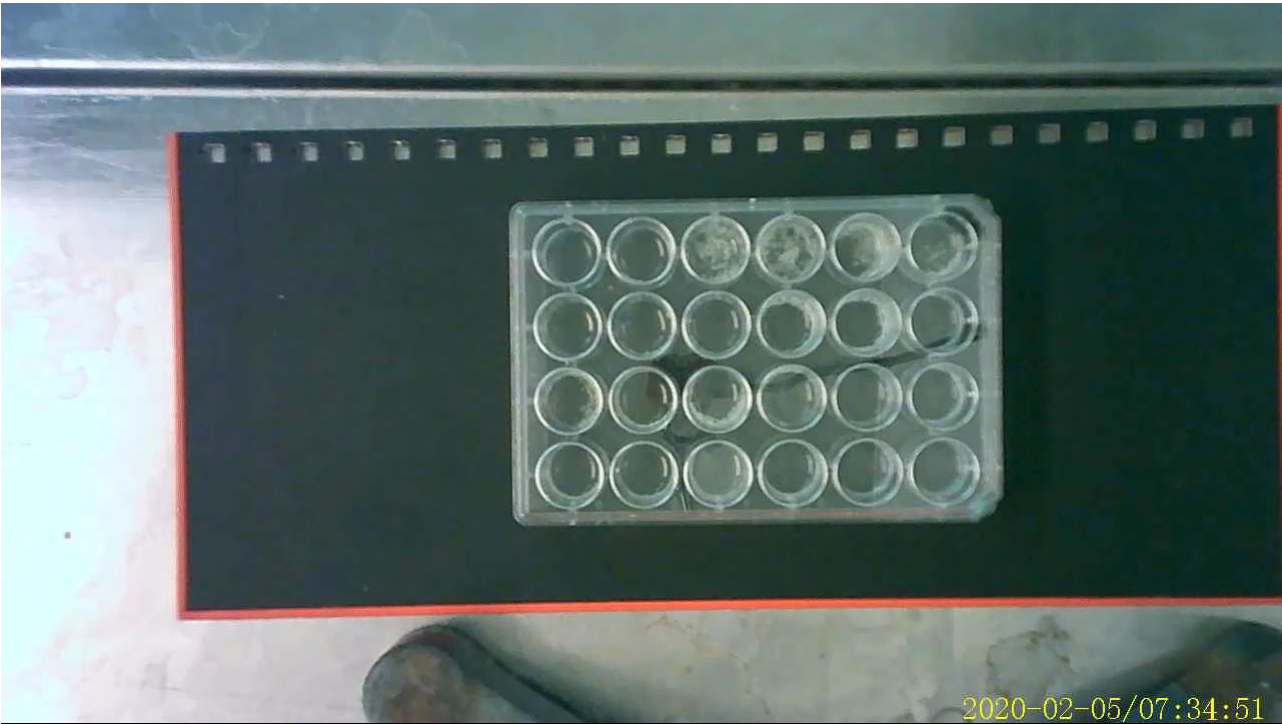

180 min:

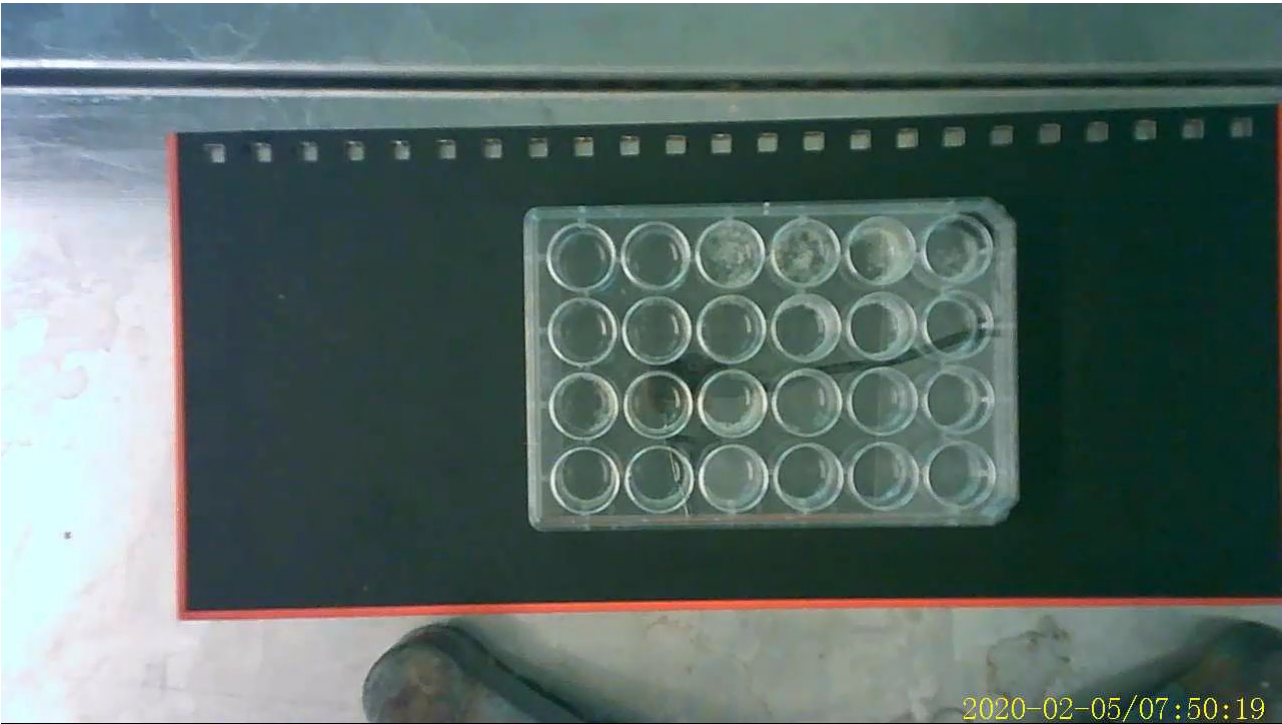

240 min:

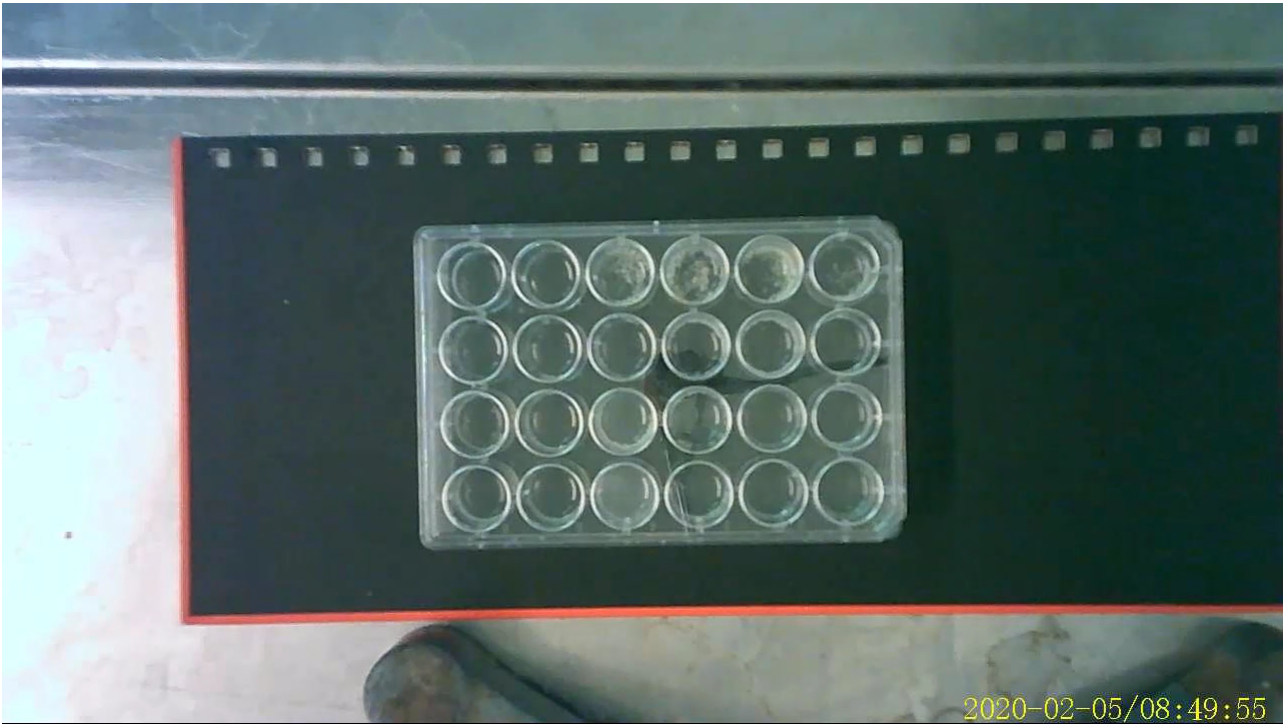

300 min:

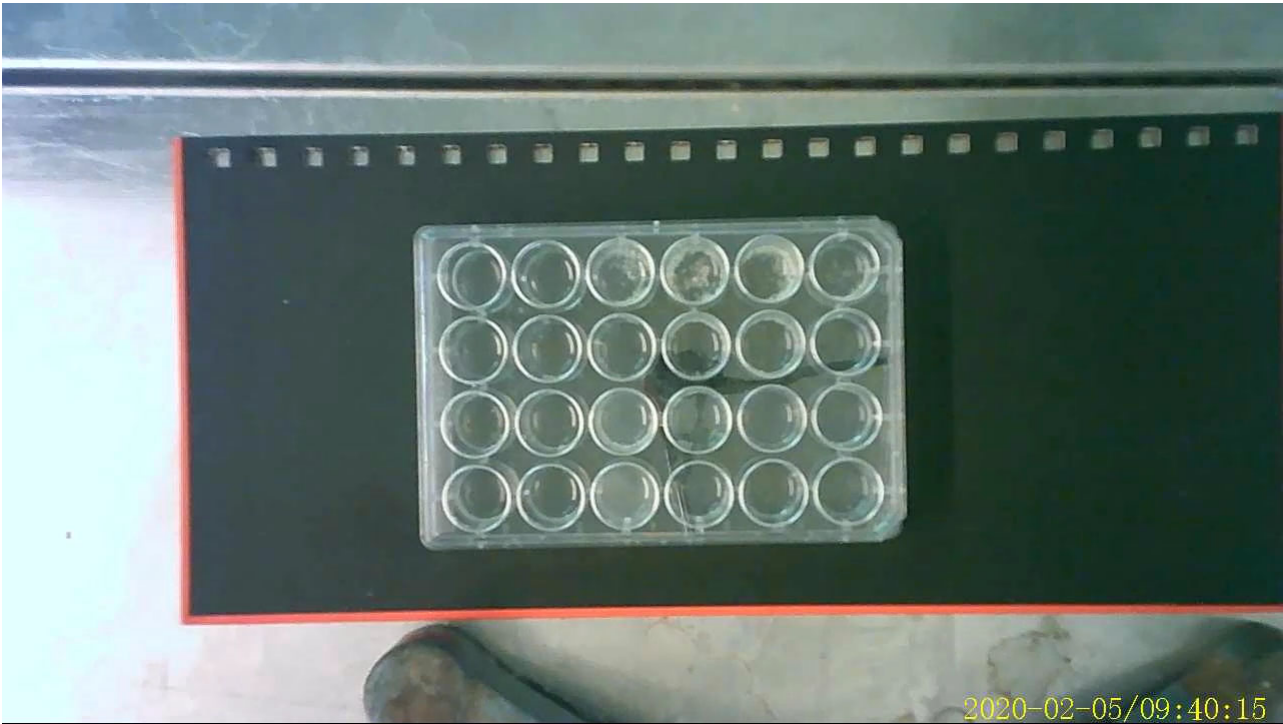

Supplement: s1 [file s1]
